# Supplementary material for: Prognostic gene expression and microRNA profiling signatures and genetic alterations in primary testicular diffuse large B-cell lymphoma
Source: Research Square preprint supplement (doi:10.21203/rs.3.rs-5732026/v1), 2025-01-06

## Supplementary Figure legends

### **Supplementary Figure 1.** Prognostic and GEP analysis for clinicopathological factors. (A-B)

Forest plots showing the effects of clinicopathological factors on overall survival (OS, panel A) and progression-free survival (PFS, panel B) of the PT-DLBCL cohort. (C) Heatmaps for significantly differentially expressed genes (FDR <0.05, 198 genes for age>60 and 318 genes for tumor size≥7cm)

### **Supplementary Figure 2.** Prognostic analysis for genetic alterations in PT-DLBCL. (A)

Genetic subtypes did not show significant impact on progression-free survival (PFS) of patients with PT-DLBCL. Patients with a <5% variant allele frequency (VAF) of *TP53* mutation by DNA sequencing showed a trend of poorer overall survival (OS) than those with wild-type *TP53* DNA sequence. (B) MSI-high by DNA sequencing analysis was associated with significantly better PFS in PT-DLBCL. CIBERSORT analysis for corresponding RNA-seq data showed that MSI-high was associated with a lower mean proportion of M0 (unpolarized) macrophages in the PT-DLBCL tissue samples. (C) High numbers of chromosomes with copy number variations (CNVs) was associated with a significantly poorer PFS in the PT-DLBCL cohort. There were no associations between CNV numbers and age>60 or tumor size≥5cm. (D) By FISH analysis, patients with *BCL2* gene amplification, >4 polyploid, or *BCL2* gene rearrangement had significantly poorer PFS than other patients with PT-DLBCL. *BCL6* and *MYC* gene alterations by FISH analysis did not show significant prognostic effects.

### **Supplementary Figure 3.** Unsupervised clustering and prognostic analysis for RNA-seq data

in DLBCL. (A) Visualization of significantly differentially expressed 533 genes between PT-

DLBCL and systemic DLBCL cohorts by unsupervised clustering. **(B)** Unsupervised clustering in the PT-DLBCL cohort by genes upregulated in systemic DLBCL compared with PT-DLBCL. Significant prognostic differences were observed between the two clusters of PT-DLBCL. **(C)** The TLT cluster had a significantly poorer progression-free survival (PFS) than the ME cluster in the overall PT-DLBCL cohort and subcohort of patients less than 61 years old. **(D)** Top: Unsupervised clustering of the PT-DLBCL cohort by 150 genes upregulated in PT-DLBCL compared with systemic DLBCL (see more details on TLT and ME clusters in the main text). Bottom: Significantly differentially expressed 870 genes between the TLT and ME clusters. Survival curves below showed that the prognostic effect of TLT vs. ME was independent of MCD-like genetic subtype and CNV  $\geq 3$ .

**Supplementary Figure 4. *MYD88* mutation and prognostic analysis in PT-DLBCL. (A)**

Scatter plots show *BTK* mRNA levels by RNA-seq in PT-DLBCL and systemic DLBCL with wild-type or mutated *MYD88* according to RNA-seq variant analysis or DNA sequencing results. PT-DLBCL with wild-type *MYD88* showed a non-significant trend of better survival compared with systemic DLBCL with wild-type *MYD88*. Enrichment dot plot shows enriched GO terms and KEGG pathways in 63 genes upregulated in PT-DLBCL with wild-type *MYD88* compared with PT-DLBCL with mutated *MYD88*. **(B)** Significantly differentially expressed 469 genes between patients with and without *MYD88* mutations by DNA sequencing analysis. **(C)** No significant differences in patient survival were observed between PT-DLBCL and systemic DLBCL, between patients with wild-type *MYD88*, and between patients with *MYD88* mutation by DNA sequencing analysis. **(D)** Significantly differentially expressed 163 genes between PT-DLBCL patients with *MYD88* mutation and systemic DLBCL patients with *MYD88* mutation by DNA sequencing analysis.

**Supplementary Figure 5.** (A) Boxplot for the abundances of 22 immune cell subpopulations by CIBERSORT analysis in G1 to G5 clusters. (B) Volcano plot and heatmap by unsupervised clustering for significantly differentially expressed microRNAs between PT-DLBCL and systemic DLBCL. (C) Unsupervised clustering of the PT-DLBCL microRNA profiling cohort using 40 microRNAs, including top 20 up and top 20 down microRNAs in PT-DLBCL compared with systemic DLBCL. The cluster with high expression of 16 upregulated microRNAs had significantly poorer OS and PFS in the PT-DLBCL cohort. (D) Heatmap showing differential expression of genes with  $q < 0.06$  between two PT-DLBCL patient groups in panel C clustered by microRNAs.

**Supplementary Figure 6.** Expression of top 20 up (A) and top 20 down (B) microRNAs in our PT-DLBCL compared with systemic DLBCL cohorts in normal and diseased tissues of testis, brain, blood, and lymph nodes in the miTED database.

Suppl. Figure 1

## A. OS

|                             | P value | Hazard Ratio         |
|-----------------------------|---------|----------------------|
| Age>60                      | 0.020   | 2.013(1.155- 3.510)  |
| Stage3- 4                   | 0.067   | 1.716(0.888- 3.318)  |
| ECOG>1                      | 0.009   | 3.191(0.688- 14.810) |
| LDH elevated                | 0.197   | 1.453(0.810- 2.606)  |
| Extranodal involvement      | 0.248   | 1.461(0.708- 3.017)  |
| IPI>2                       | 0.042   | 1.945(0.874- 4.330)  |
| B- symptom                  | 0.506   | 0.675(0.251- 1.813)  |
| Tumor size...5cm            | 0.092   | 1.677(0.934- 3.009)  |
| Left vs. right or bilateral | 0.196   | 1.523(0.791- 2.932)  |
| Regional nodal involvement  | 0.037   | 2.037(0.869- 4.775)  |
| Faraway nodal involvement   | 0.862   | 1.111(0.321- 3.843)  |
| ABC vs. GCB                 | 0.915   | 0.965(0.498- 1.870)  |
| Rituximab                   | 0.056   | 0.573(0.299- 1.098)  |

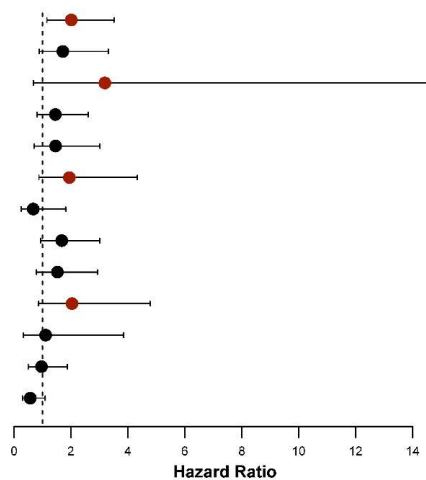

## C

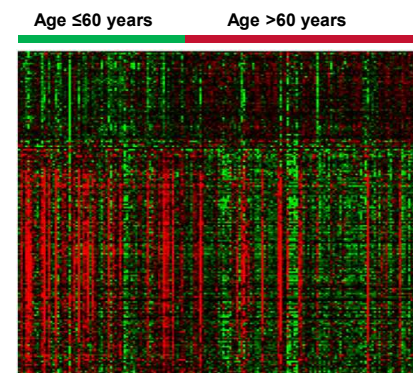

## B. PFS

|                             | P value | Hazard Ratio        |
|-----------------------------|---------|---------------------|
| Age>60                      | 0.120   | 1.466(0.919- 2.338) |
| Stage3- 4                   | 0.028   | 1.732(0.983- 3.053) |
| ECOG>1                      | 0.090   | 2.147(0.596- 7.736) |
| LDH elevated                | 0.122   | 1.465(0.886- 2.420) |
| Extranodal involvement      | 0.084   | 1.611(0.858- 3.025) |
| IPI>2                       | 0.019   | 1.949(0.954- 3.985) |
| B- symptom                  | 0.367   | 0.632(0.275- 1.453) |
| Tumor size...5cm            | 0.056   | 1.654(0.997- 2.743) |
| Left vs. right or bilateral | 0.723   | 1.102(0.639- 1.898) |
| Regional nodal involvement  | 0.017   | 2.006(0.971- 4.142) |
| Faraway nodal involvement   | 0.281   | 1.591(0.568- 4.454) |
| ABC vs. GCB                 | 0.940   | 0.979(0.556- 1.724) |
| Rituximab                   | 0.222   | 0.734(0.427- 1.264) |

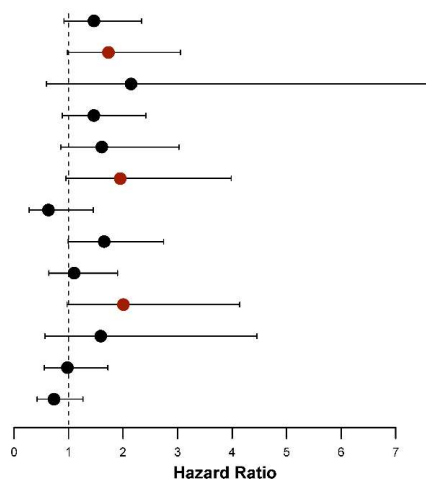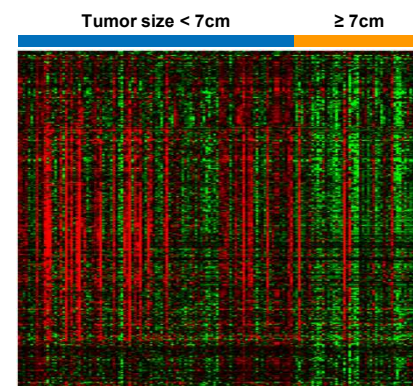

Suppl. Figure 2

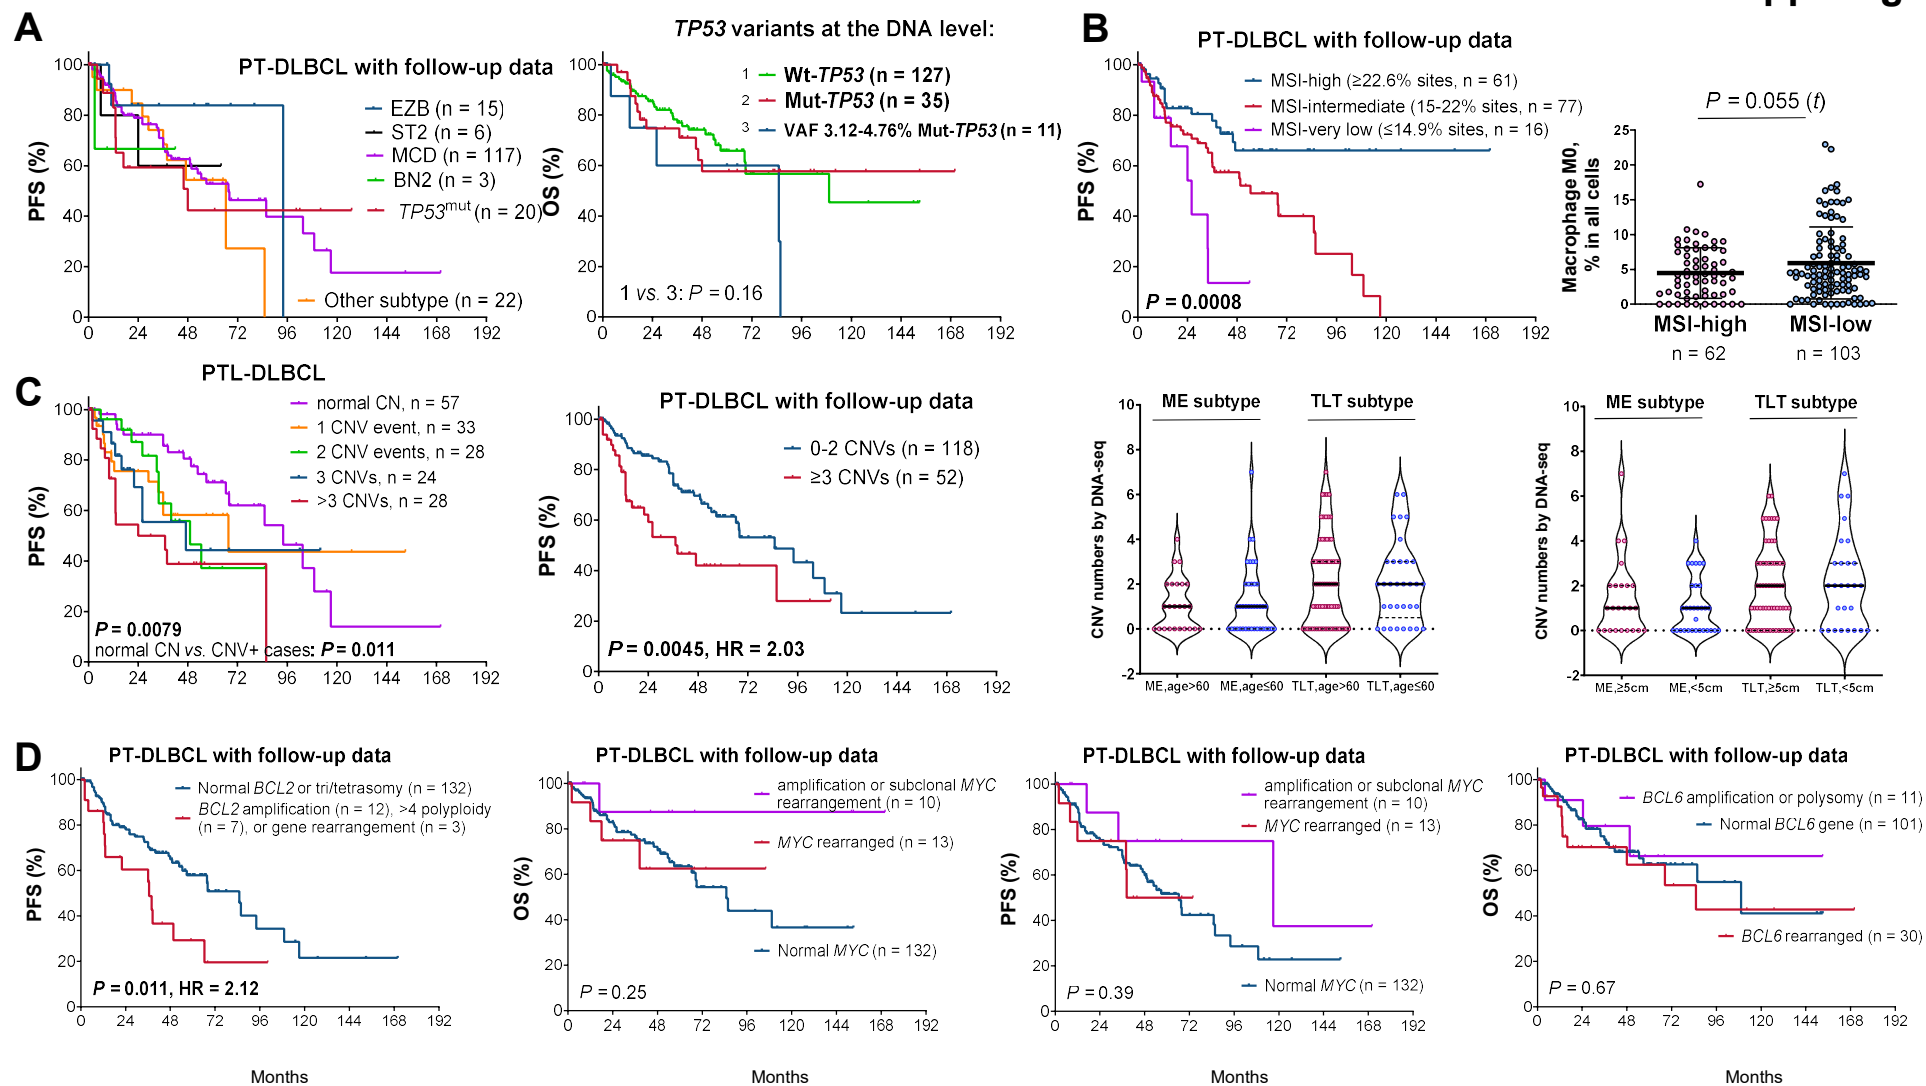



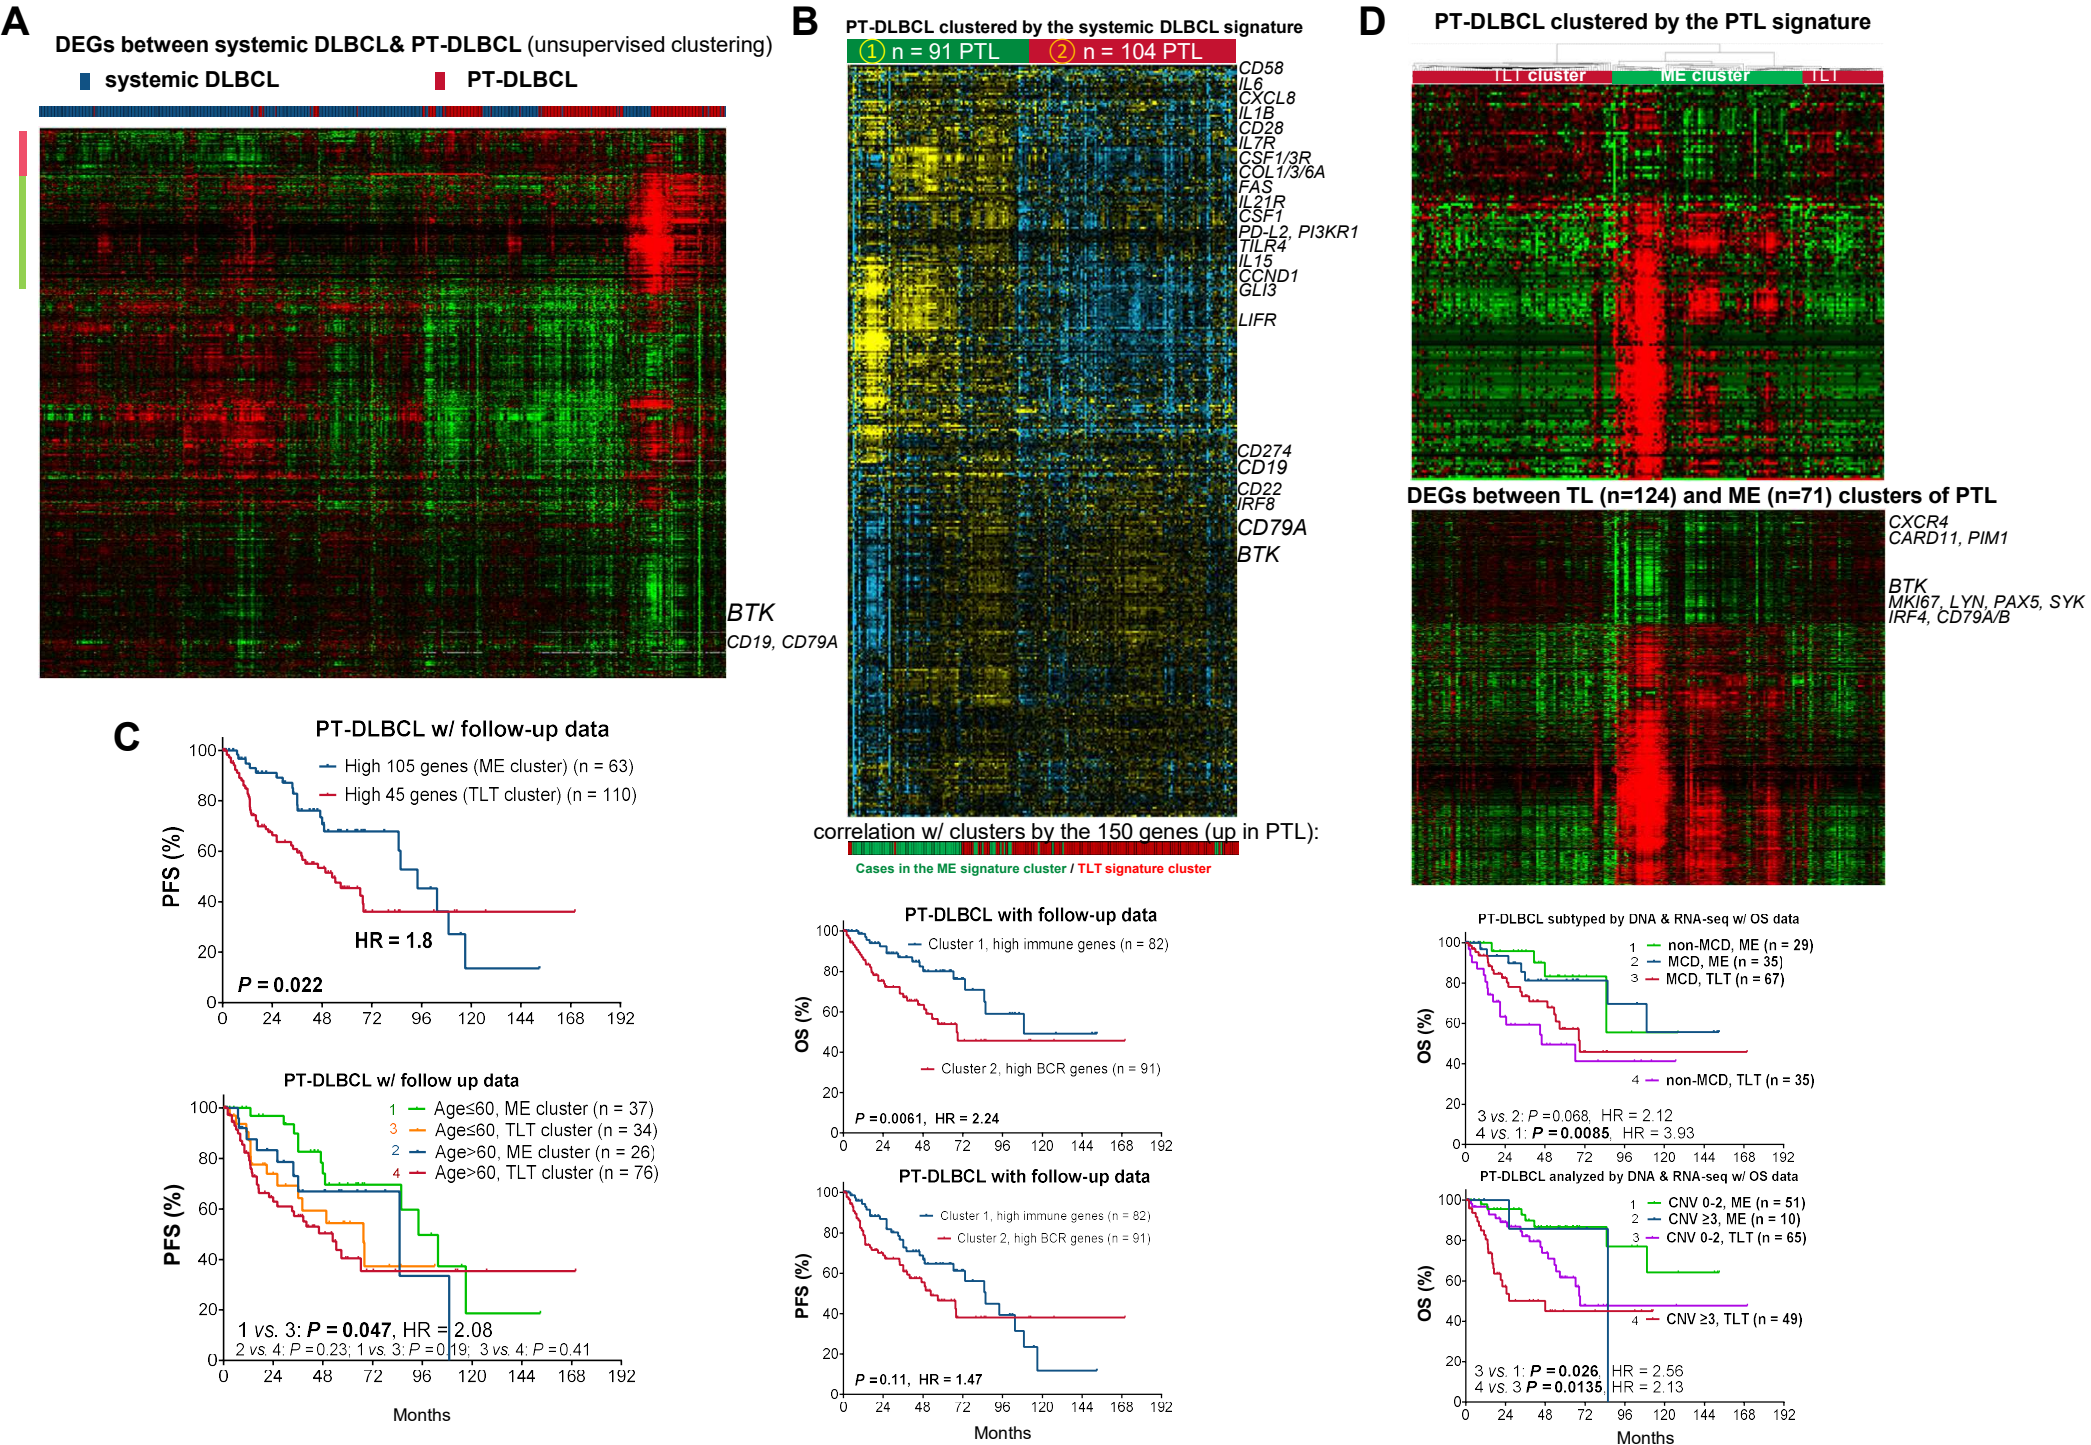

Suppl. Figure 4

A

Wild-type vs. Mutated *MYD88*-RNA

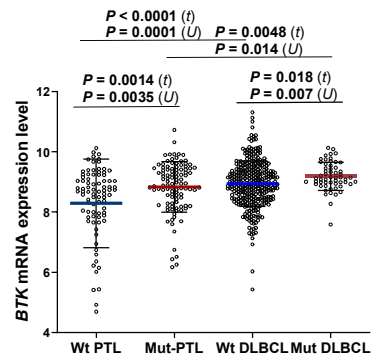

Wild-type vs. Mutated *MYD88*-DNA

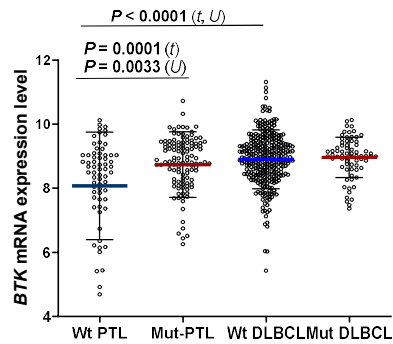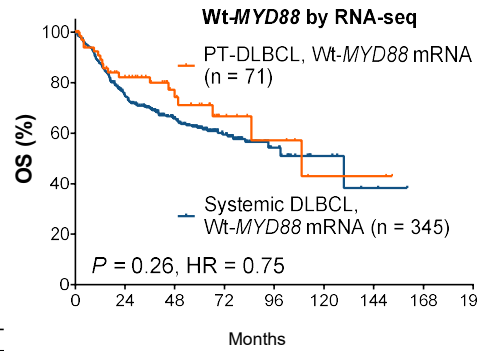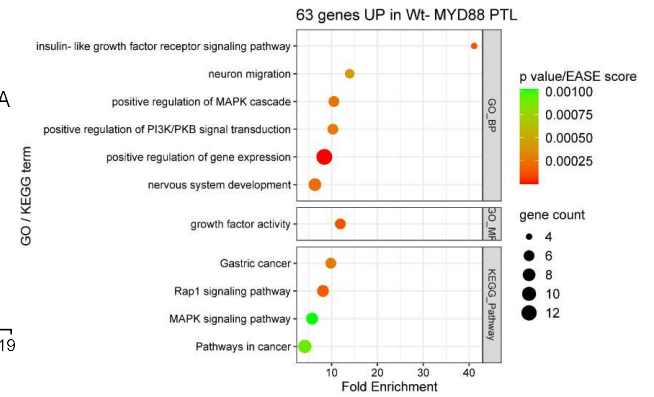

Top KEGG pathway: Rap1 signaling pathway

B

Wt-MYD88 n = 68 PTL Mut-MYD88 DNA n = 118 PTL

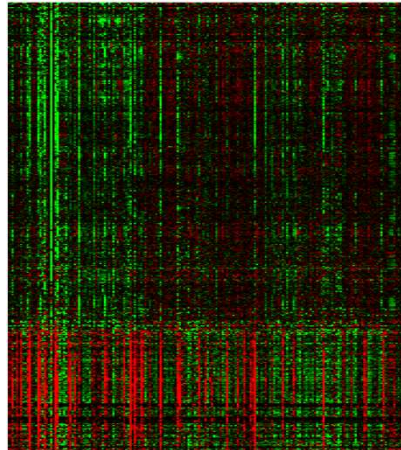

C

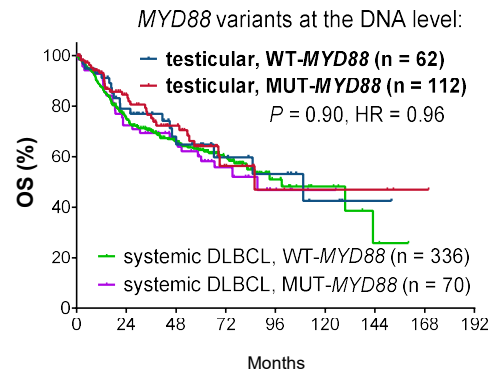

D

Mut-MYD88-DNA Systemic DLBCL n = 70

Mut-MYD88-DNA PT-DLBCL n = 118

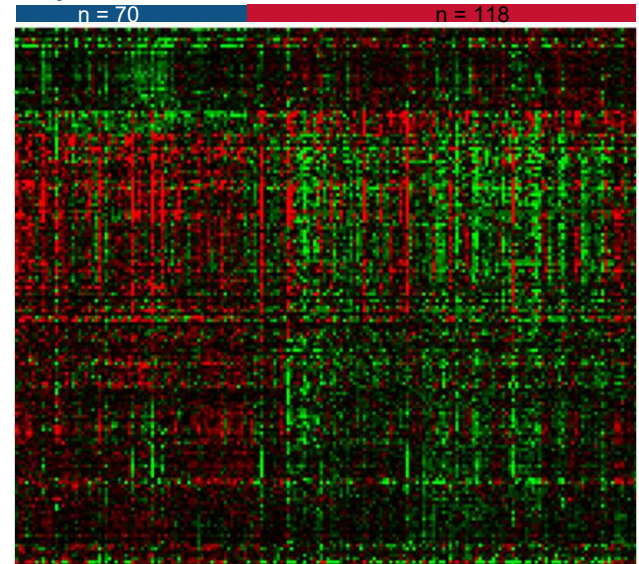



Suppl. Figure 5

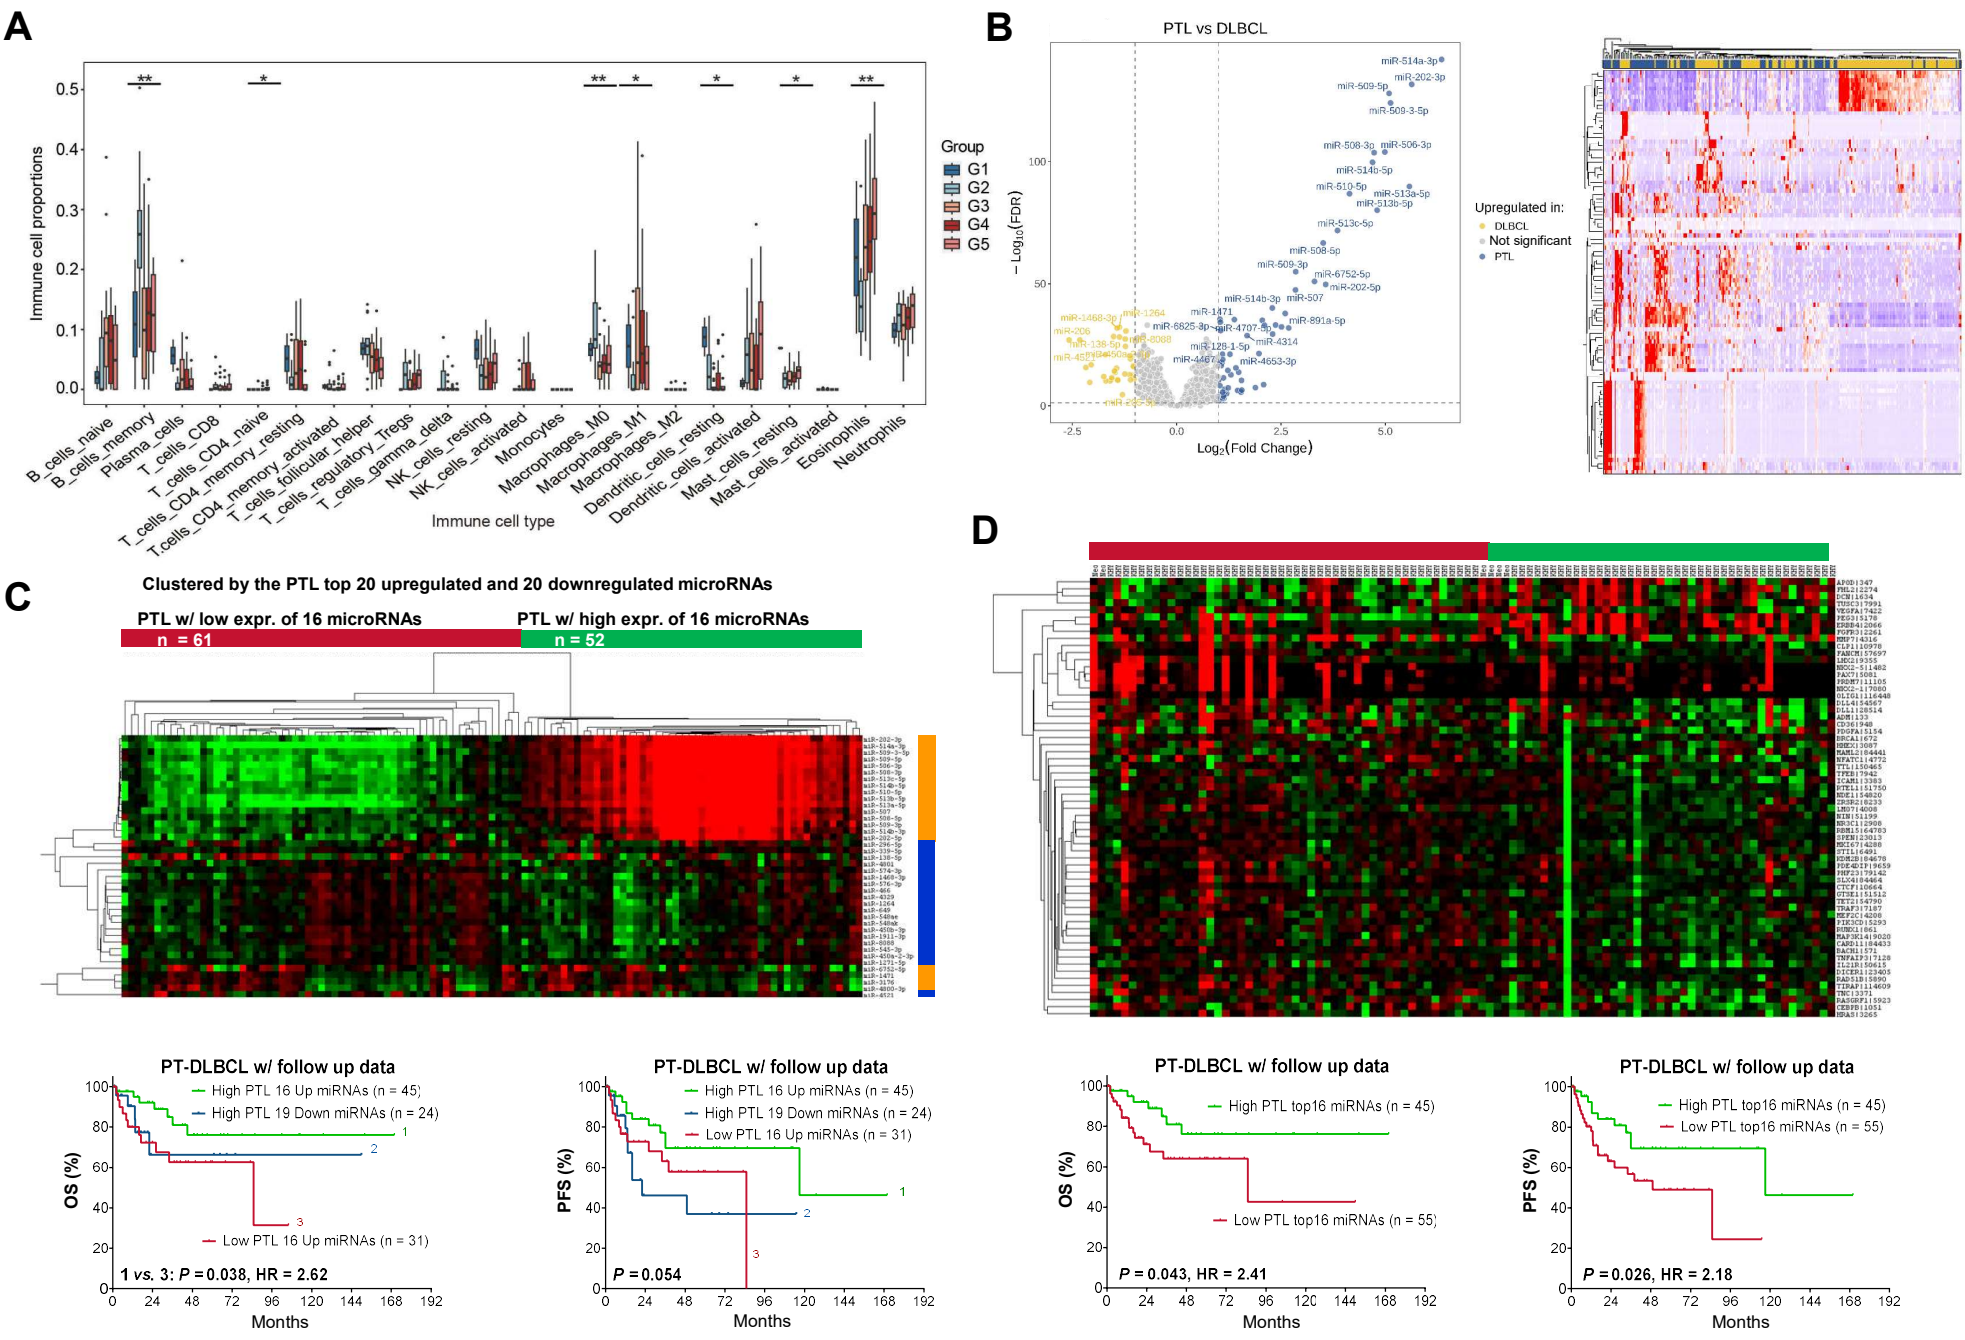



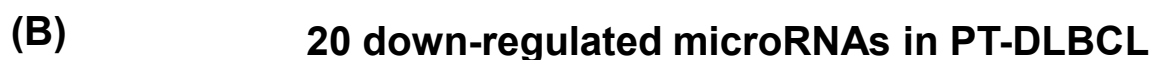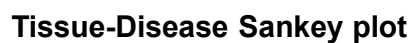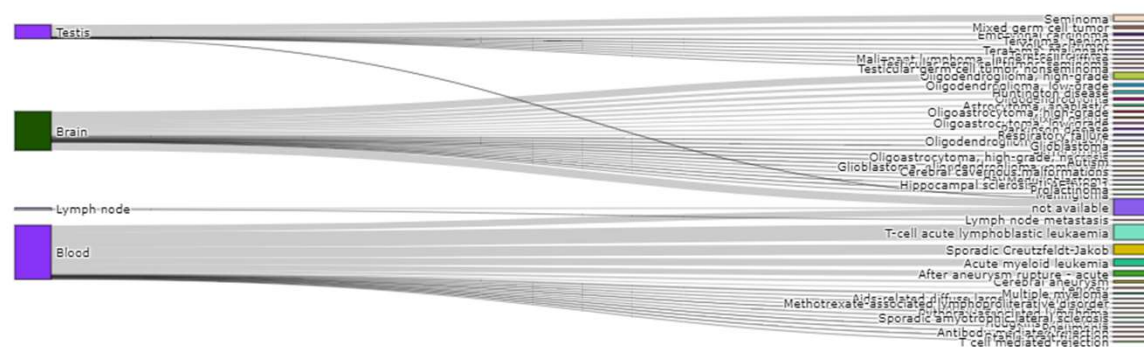

Supplement: Supplementary file 1 [file 7429fc177b9e07f03249c634.pdf]
